# Supplementary material for: Wind Estimation based on Flight Dynamics of Unmanned Aerial Vehicle and Its Environmental Application
Source: Copernicus journal article supplement (doi:10.5194/egusphere-2025-4752), 2025-10-10
Supplement: Supplementary file 1 [file egusphere-2025-4752-supplement.pdf]

## **Wind Estimation based on Flight Dynamics of Unmanned Aerial Vehicle and Its Environmental Application**

Dukun Chen, Weifeng Su, Shaojie Jiang, Honglong Yang, Chunsheng Zhang, Shutong Jiang, Dongyang Chang, Yuxin Liang, Hao Wang, Xin Yang, Tzung-May Fu, Zhenzhong Zeng, Lei Zhu, Huizhong Shen, Chen Wang, Jianhuai Ye\*

*\*Correspondence to:* Jianhuai Ye (yejh@sustech.edu.cn)

The supplemental materials have 7 pages and include the following items:

- Table S1    Fitting coefficients  $a_{M,\eta}$  and  $b_{M,\eta}$  for the UAV inclination-wind speed relationships.
- Table S2    Fitting coefficients  $k$  and  $b$  for wind sensor calibrations under various flight conditions.
- Figure S1   Relationship between input wind speed,  $C_d$ ,  $A_{UAV}$ ,  $A_{UAV}C_d$  and UAV inclination angle  $\Psi$ .
- Figure S2   Comparison between UAV-based wind direction estimates and reference measurements from the meteorological observation tower during vertical flight operations.
- Figure S3   UAV-based wind direction estimation and deviation analysis comparing methods 1 versus 2 (A-I, A-II) and methods 2 versus 3 (B-I, B-II) from the field observation campaign.
- Figure S4   Performance of wind estimation using machine learning algorithms.
- Figure S5   Comparison between UAV-attitude-based wind speed estimates (from method 3) and reference measurements from the meteorological observation tower during hovering flight operations.

**Table S1** Fitting coefficients  $a_{M,\eta}$  and  $b_{M,\eta}$  for the UAV inclination-wind speed relationships.

| Payload                        |                  | Relative wind | Coefficient  |              | $R^2$ |
|--------------------------------|------------------|---------------|--------------|--------------|-------|
| configuration                  |                  | direction     | $a_{M,\eta}$ | $b_{M,\eta}$ |       |
| Default setting                | M <sub>0</sub>   | 0°            | 2.29         | 0.71         | 0.987 |
|                                | M <sub>0</sub>   | 45°           | 2.99         | 0.58         | 0.964 |
|                                | M <sub>0</sub>   | 90°           | 1.94         | 0.82         | 0.949 |
|                                | M <sub>0</sub>   | 180°          | 0.57         | 1.23         | 0.977 |
|                                | M <sub>0</sub>   | 225°          | 0.53         | 1.21         | 0.985 |
|                                | M <sub>0</sub>   | 270°          | 0.58         | 1.22         | 0.986 |
| Additional front-top payload   | M <sub>0+f</sub> | 0°            | 2.80         | 0.71         | 0.976 |
|                                | M <sub>0+f</sub> | 45°           | 3.43         | 0.56         | 0.849 |
|                                | M <sub>0+f</sub> | 90°           | 2.27         | 0.79         | 0.951 |
|                                | M <sub>0+f</sub> | 180°          | 0.57         | 1.32         | 0.987 |
|                                | M <sub>0+f</sub> | 225°          | 0.59         | 1.22         | 0.991 |
|                                | M <sub>0+f</sub> | 270°          | 0.65         | 1.22         | 0.985 |
| Additional central-top payload | M <sub>0+m</sub> | 0°            | 2.94         | 0.74         | 0.942 |
|                                | M <sub>0+m</sub> | 45°           | 3.52         | 0.59         | 0.881 |
|                                | M <sub>0+m</sub> | 90°           | 1.77         | 0.92         | 0.937 |
|                                | M <sub>0+m</sub> | 180°          | 0.45         | 1.40         | 0.967 |
|                                | M <sub>0+m</sub> | 225°          | 0.41         | 1.38         | 0.981 |
|                                | M <sub>0+m</sub> | 270°          | 0.49         | 1.42         | 0.990 |

\*: The fitting algorithm for these coefficients is:  $V_{wind,M,\eta} = a_{M,\eta} \cdot \Psi^{b_{M,\eta}}$ , where  $V_{wind,M,\eta}$  is the wind speed and  $\Psi$  is the UAV inclination angle.

**Table S2** Fitting coefficients  $k$  and  $b$  for wind sensor calibrations under various flight conditions\*.

| Payload                        |                  | Relative wind | $k$  | $b$    | $R^2$ |
|--------------------------------|------------------|---------------|------|--------|-------|
| configuration                  |                  | direction     |      |        |       |
| Default setting                | M <sub>o</sub>   | 0°            | 0.98 | 1.51   | 0.994 |
|                                | M <sub>o</sub>   | 45°           | 1.14 | 1.19   | 0.993 |
|                                | M <sub>o</sub>   | 90°           | 0.84 | 0.42   | 0.988 |
|                                | M <sub>o</sub>   | 180°          | 1.01 | 0.52   | 0.985 |
|                                | M <sub>o</sub>   | 225°          | 1.19 | 1.36   | 0.994 |
|                                | M <sub>o</sub>   | 270°          | 0.92 | 0.40   | 0.973 |
| Additional front-top payload   | M <sub>o+f</sub> | 0°            | 0.99 | 0.95   | 0.988 |
|                                | M <sub>o+f</sub> | 45°           | 1.09 | 0.38   | 0.993 |
|                                | M <sub>o+f</sub> | 90°           | 0.98 | 0.0036 | 0.995 |
|                                | M <sub>o+f</sub> | 180°          | 1.01 | 0.55   | 0.990 |
|                                | M <sub>o+f</sub> | 225°          | 1.09 | 0.89   | 0.991 |
|                                | M <sub>o+f</sub> | 270°          | 1.02 | -0.17  | 0.992 |
| Additional central-top payload | M <sub>o+m</sub> | 0°            | 0.88 | 1.28   | 0.991 |
|                                | M <sub>o+m</sub> | 45°           | 1.05 | 0.81   | 0.977 |
|                                | M <sub>o+m</sub> | 90°           | 0.83 | 0.54   | 0.995 |
|                                | M <sub>o+m</sub> | 180°          | 0.96 | 0.68   | 0.978 |
|                                | M <sub>o+m</sub> | 225°          | 1.14 | 0.97   | 0.990 |
|                                | M <sub>o+m</sub> | 270°          | 0.79 | 0.24   | 0.982 |

\*: The fitting algorithm for these coefficients is:  $V_{reference} = kV_{measured} + b$ , where  $V_{reference}$  is the input wind speed from the wind wall and  $V_{measured}$  is the wind speed measured by the onboard sensor.

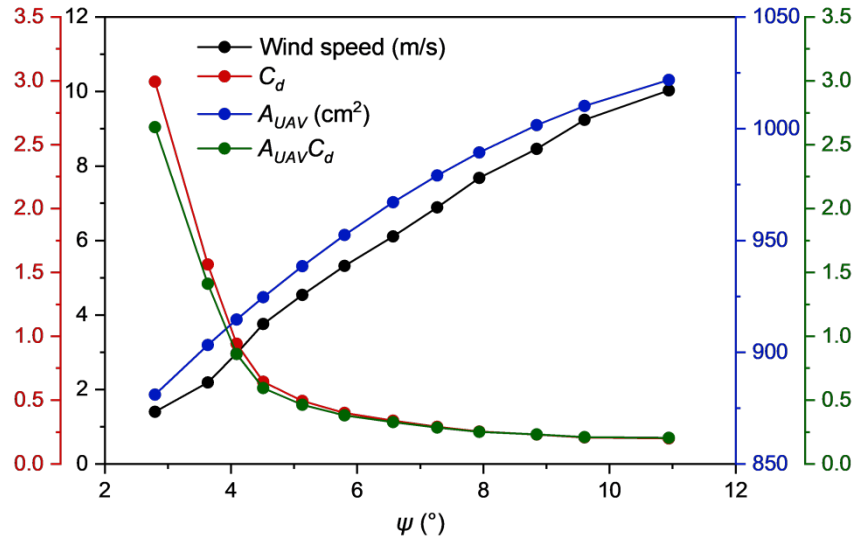

**Figure S1** Relationship between input wind speed,  $C_d$ ,  $A_{UAV}$ ,  $A_{UAV}C_d$  and UAV inclination angle  $\psi$ . Results were obtained under default payload conditions with relative wind direction of  $180^\circ$ .

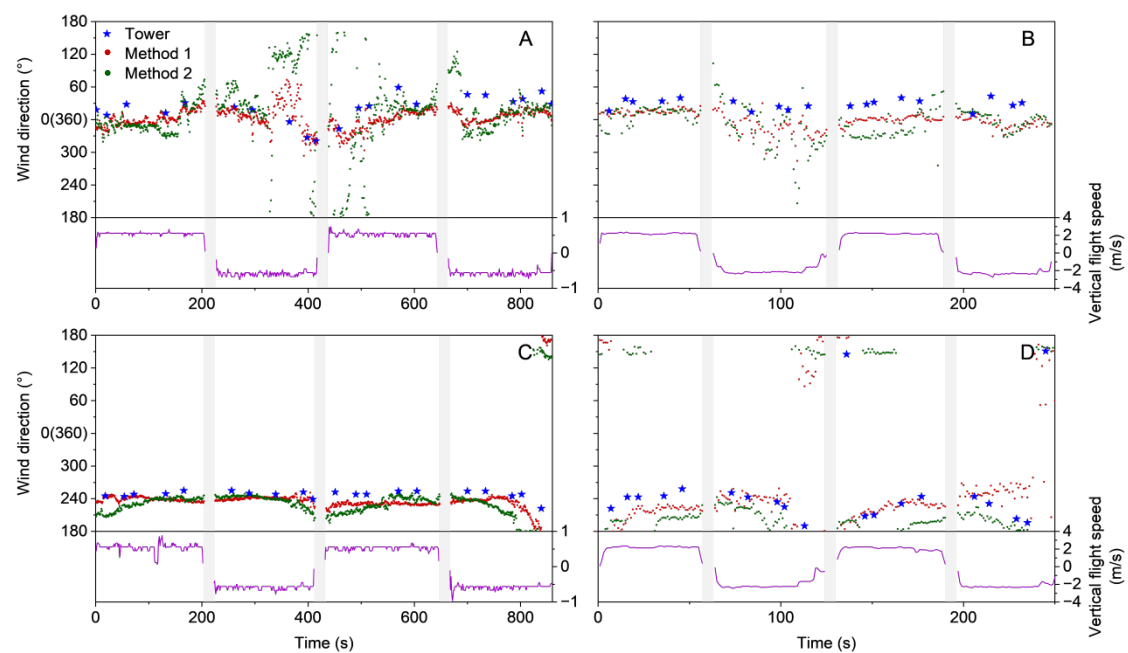

**Figure S2** Comparison between UAV-based wind direction estimates and reference measurements from the meteorological observation tower during vertical flight operations: ascending and descending at 0.5 m/s (A) and 2 m/s (B) with default payload, and at 0.5 m/s (C) and 2 m/s (D) with additional front-top payload. Gray shaded areas indicate hovering periods.

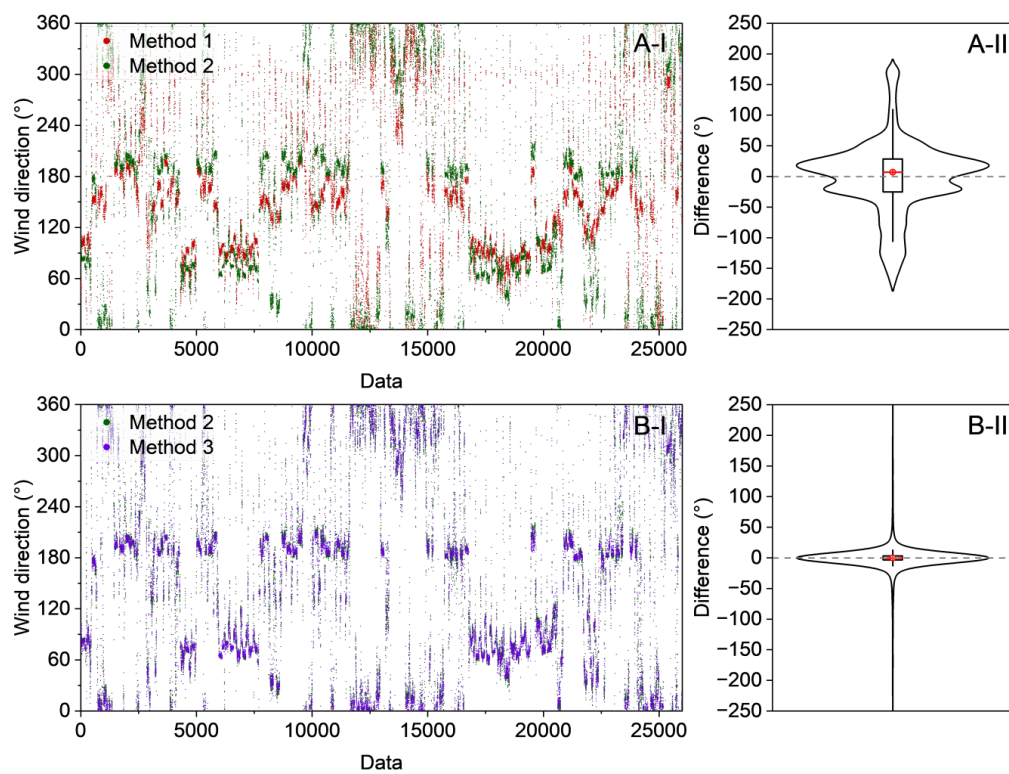

**Figure S3** UAV-based wind direction estimation and deviation analysis comparing methods 1 versus 2 (A-I, A-II) and methods 2 versus 3 (B-I, B-II) from the field observation campaign.

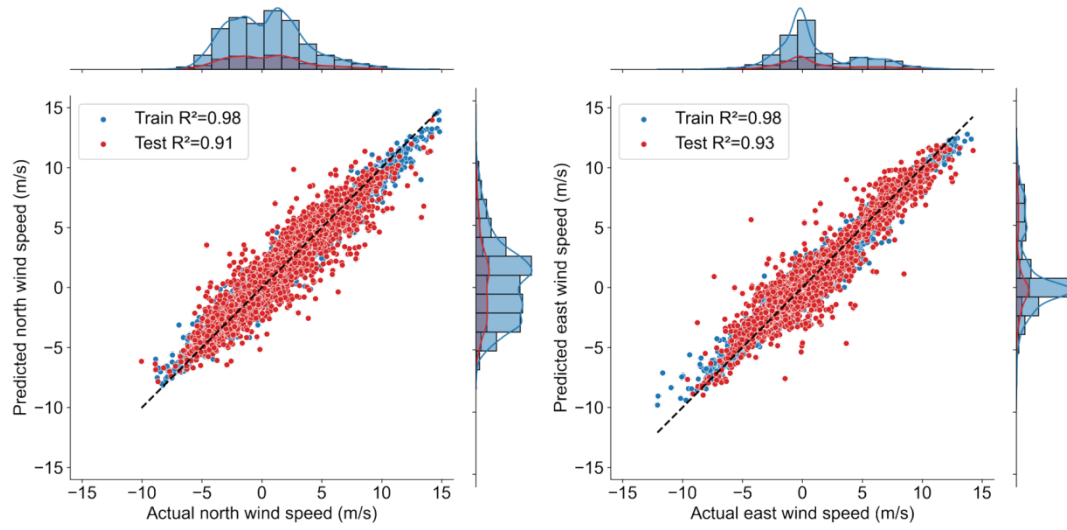

**Figure S4** Performance of wind estimation using machine learning algorithms. The wind components are separated into northward and eastward winds for better visualization. The RMSE values are 1.02 m/s and 0.93 m/s for the northward and eastward wind predictions, respectively.

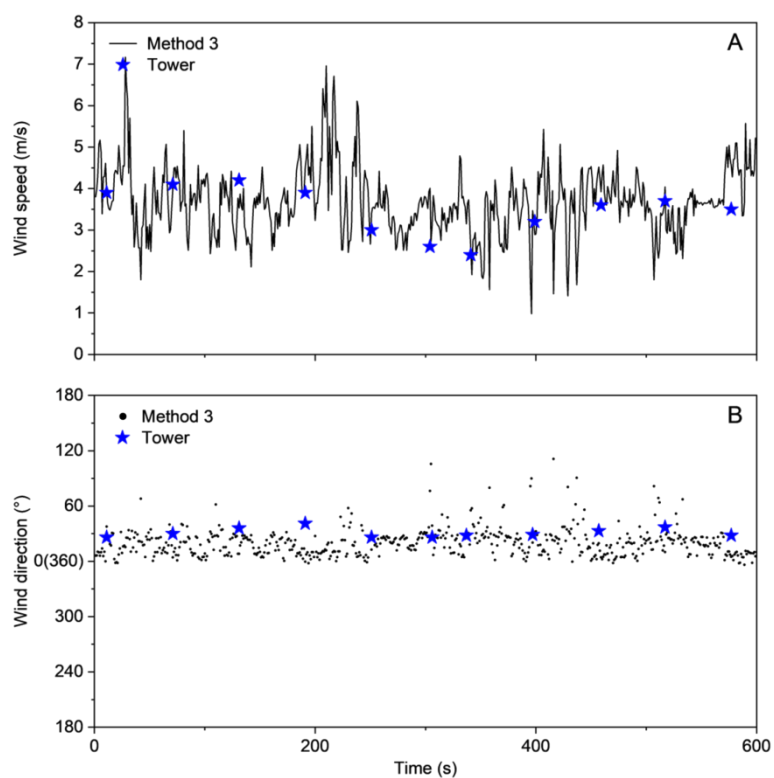

**Figure S5** Comparison between UAV-attitude-based wind speed estimates (from method 3) and reference measurements from the meteorological observation tower during hovering flight operations.
